# Supplementary material for: Assessment of transcriptomic constraint-based methods for central carbon flux inference
Source: PubMed Central journal article supplement (PMC7480874; doi:10.1371/journal.pone.0238689), 2020-09-09
Supplement: pone.0238689.s006.pdf [file pone.0238689.s006.pdf]

## Supplementary Information

### Assessment of transcriptomic constraint-based methods for central carbon flux inference

Siddharth Bhadra-Lobo<sup>1</sup>, Min Kyung Kim<sup>1</sup>, and Desmond S. Lun<sup>1,2,3</sup>

<sup>1</sup>Center for Computational and Integrative Biology, Rutgers, The State University of New Jersey, Camden, NJ, USA

<sup>2</sup>Department of Computer Science, Rutgers, The State University of New Jersey, Camden, NJ, USA

<sup>3</sup>Department of Plant Biology, Rutgers, The State University of New Jersey, New Brunswick, NJ, USA

|                                                                                              |  |
|----------------------------------------------------------------------------------------------|--|
| S1 Fig: <i>B. subtilis</i> carbon source clustering .....                                    |  |
| S2 Fig: PCC 6803 pFBA_mf vs pFBA .....                                                       |  |
| S3 Fig: <i>E. coli</i> flux directionality AC vs Full AC low correlation carbon sources..... |  |
| S4 Fig: <i>E. coli</i> flux directionality AC vs Full AC all carbon sources .....            |  |
| S5 Fig: <i>B. subtilis</i> flux directionality AC vs Full AC all carbon sources .....        |  |
| S6 Fig: PCC 6803 flux directionality DC and AC conditions .....                              |  |
| S7 Fig: PCC 7002 flux directionality DC and AC conditions .....                              |  |
| S8 Fig: Spearman correlations equivalents of main figures 1-4 .....                          |  |
| S1 Table. Measured uptake rates .....                                                        |  |
| S2 Table. PCC 6803 Pentose Phosphate Pathway Fluxes.....                                     |  |

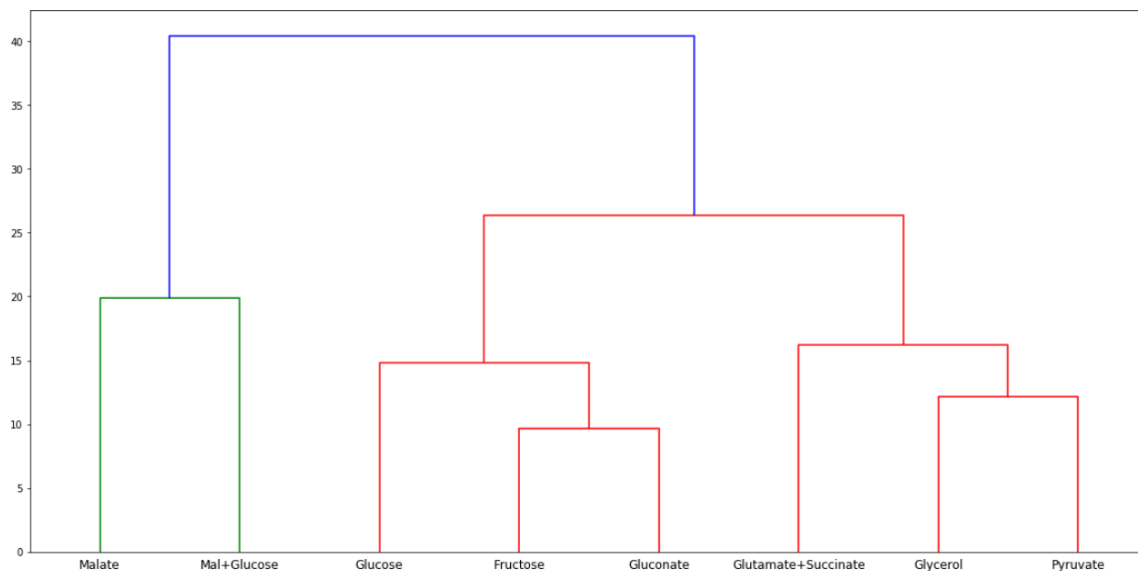

**S1 Fig A. *B. subtilis* carbon source clustering:** *B. subtilis* single and double (Malate+Glucose and Glutamate+Succinate) carbon source measured flux data dendrogram. Ward linkage was used and minimizes the sum of squared differences within all clusters based on measured flux values.

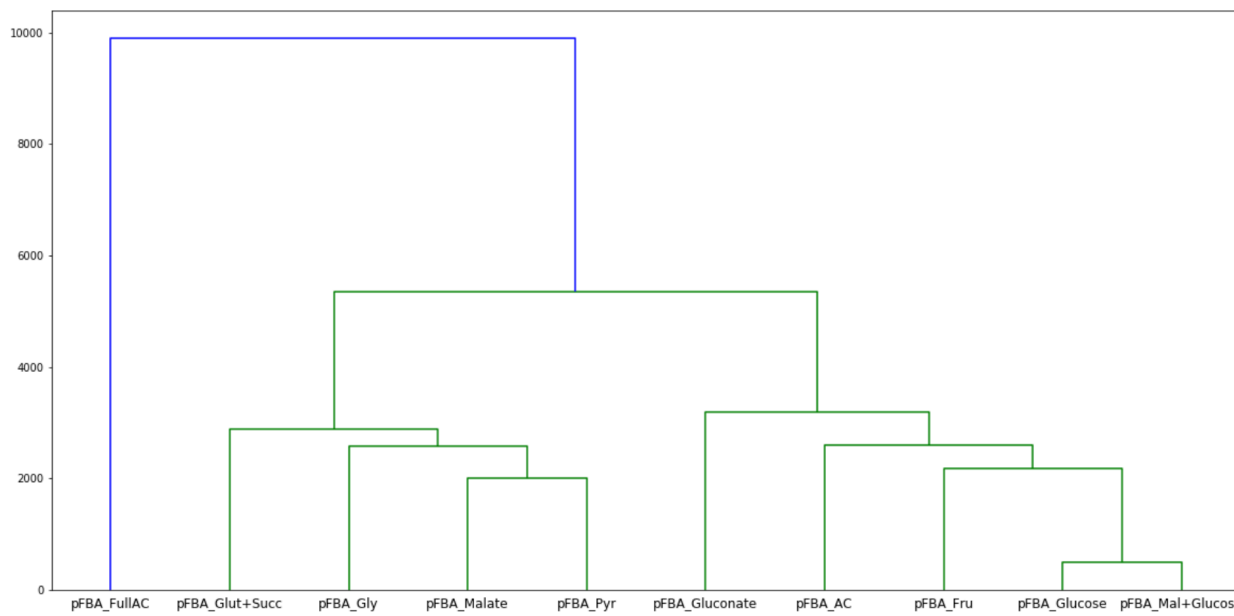

**S1 Fig B. *B. subtilis* pFBA carbon source based flux distribution clustering:** All *B. subtilis* pFBA flux distributions. AC refers to the single flux pattern produced by pFBA when allowed all 8 carbon sources. FullAC refers to the single pFBA flux distribution produced under all possible carbon sources available in the model. FullAC distribution is the outgroup. Glut+succ looks similar to the other TCA metabolite fluxes, while the AC distribution looks similar to the the sugars in the right subclusters.

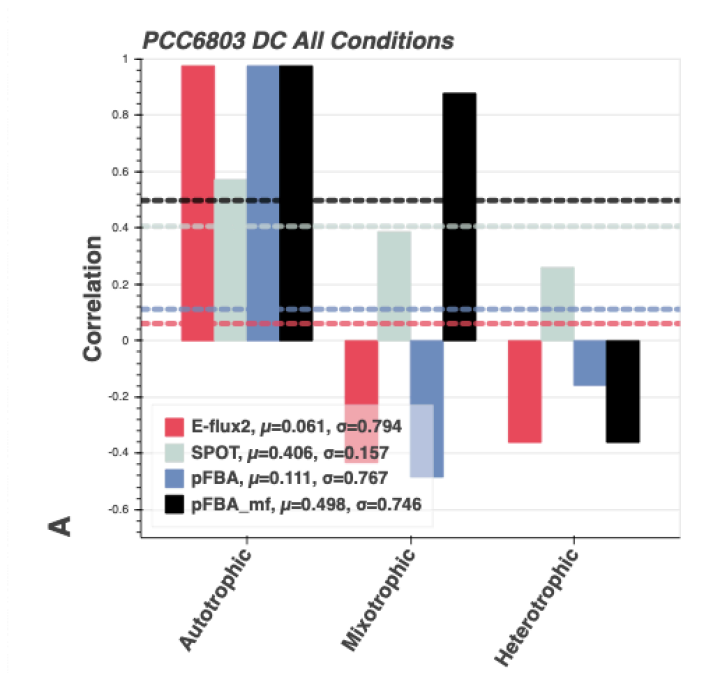

**S2 Fig. PCC 6803 pFBA\_mf vs pFBA:** Similar to Fig 3 in the main text but shows that provided measured uptake rates with pFBA\_mf (black) did not significantly improve the autotrophic flux prediction compared to pFBA (blue).

A)

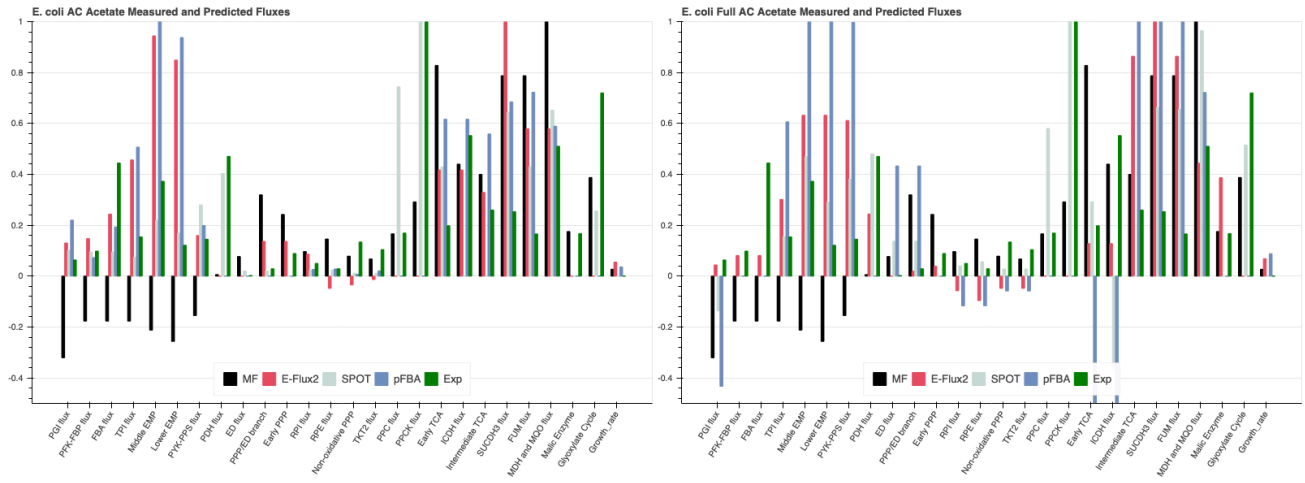

B)

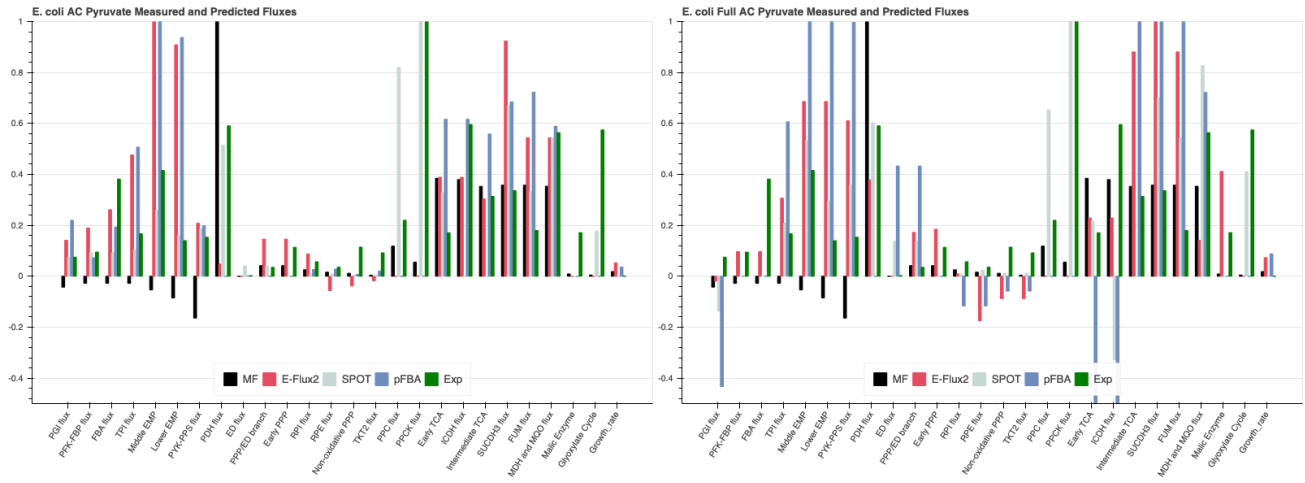

C)

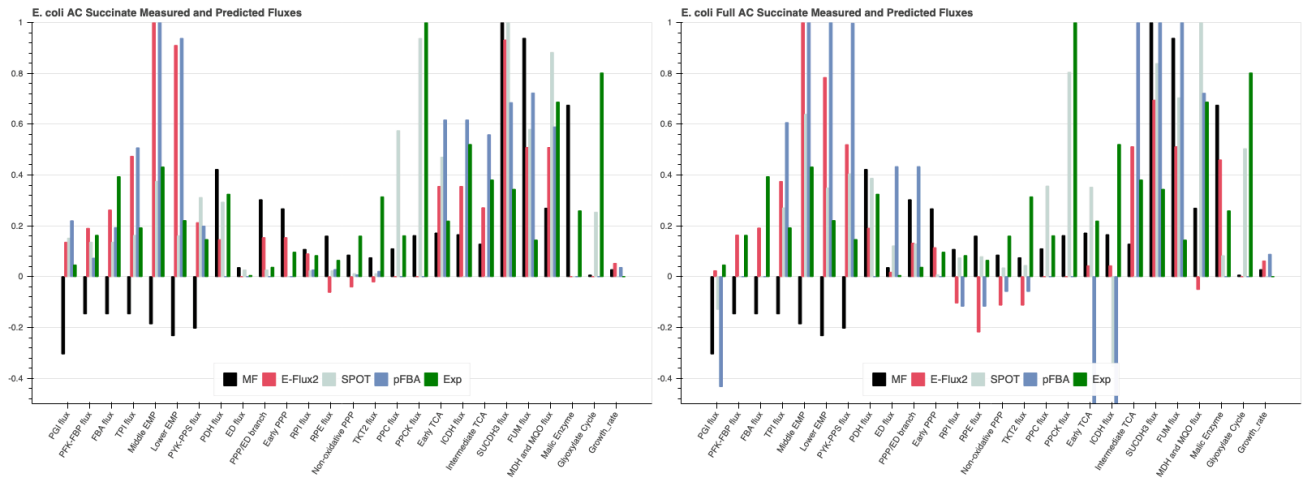

**S3 Fig. *E. coli* flux directionality AC vs Full AC:** Measured flux (black), E-Flux2 (red), SPOT (gray), pFBA (blue), and gene expression transcript abundance (green); all self-normalized to maximum values 1 and -1. Positive values reflect forward flux and negative values reflection reverse direction flux. The x-axis shows the measured central carbon flux reaction names. **(A)** Acetate data. **(B)** Pyruvate data. **(C)** Succinate data. These carbon sources had the lowest correlation values and these single carbon sources are also found in the TCA cycle. The difference in directionality between the black bars and the prediction bars highlights that glycolysis (PGI flux to PYK-PPS flux) and TCA cycle (RPI flux to TK2 flux) are being predicted in the opposite direction from the measured flux.

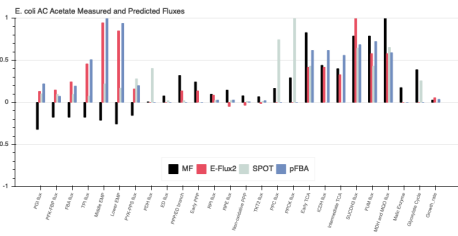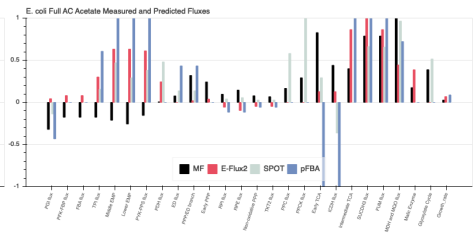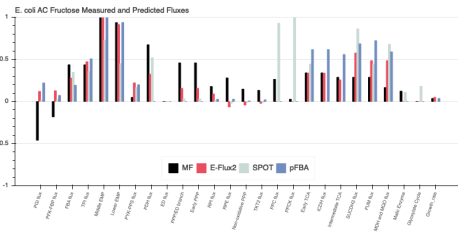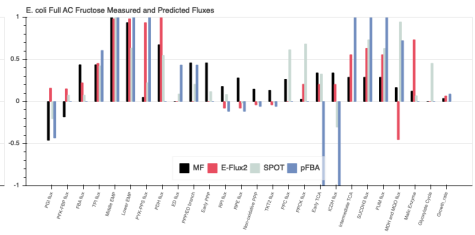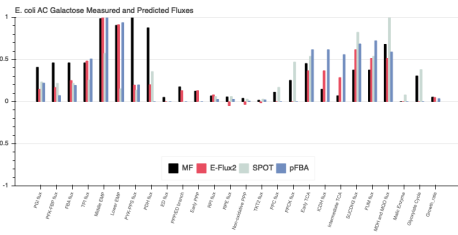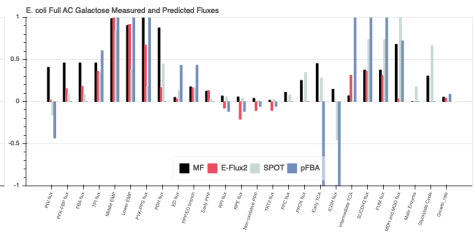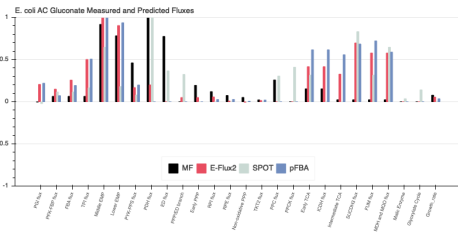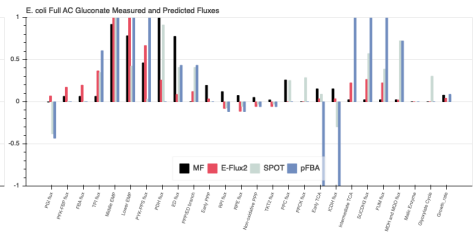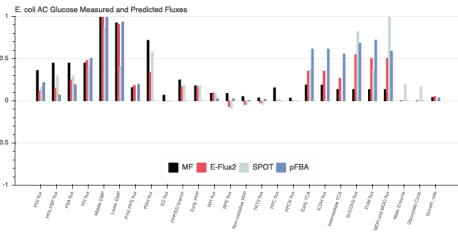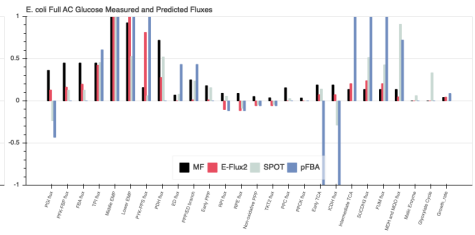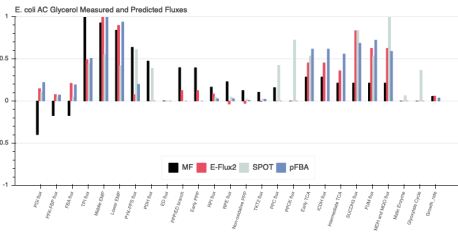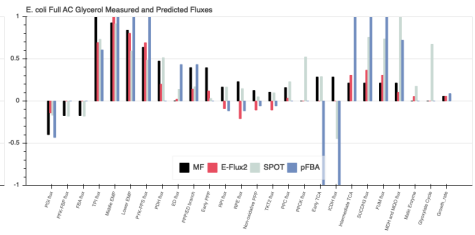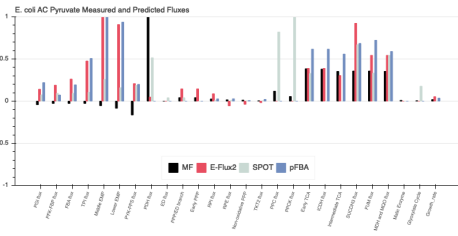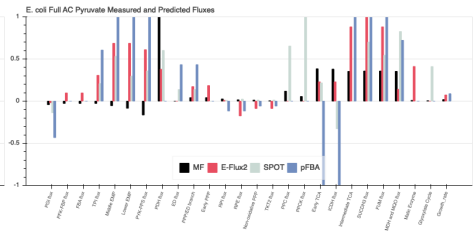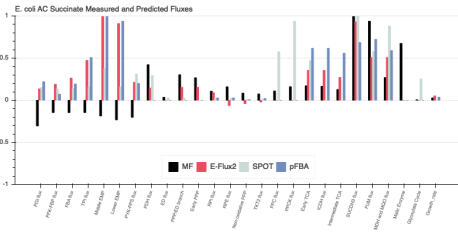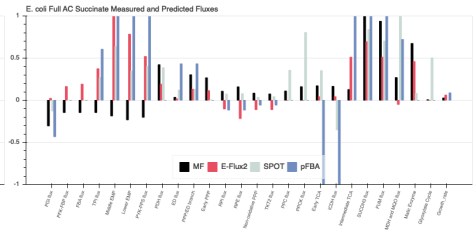

**S4 Fig. *E. coli* flux directionality AC vs Full AC all carbon sources:** Measured flux (black), E-Flux2 (red), SPOT (gray), pFBA (blue), and gene expression transcript abundance (green); all self-normalized to maximum values 1 and -1. Positive values reflect forward flux and negative values reflection reverse direction flux. The x-axis shows the measured central carbon flux reaction names.

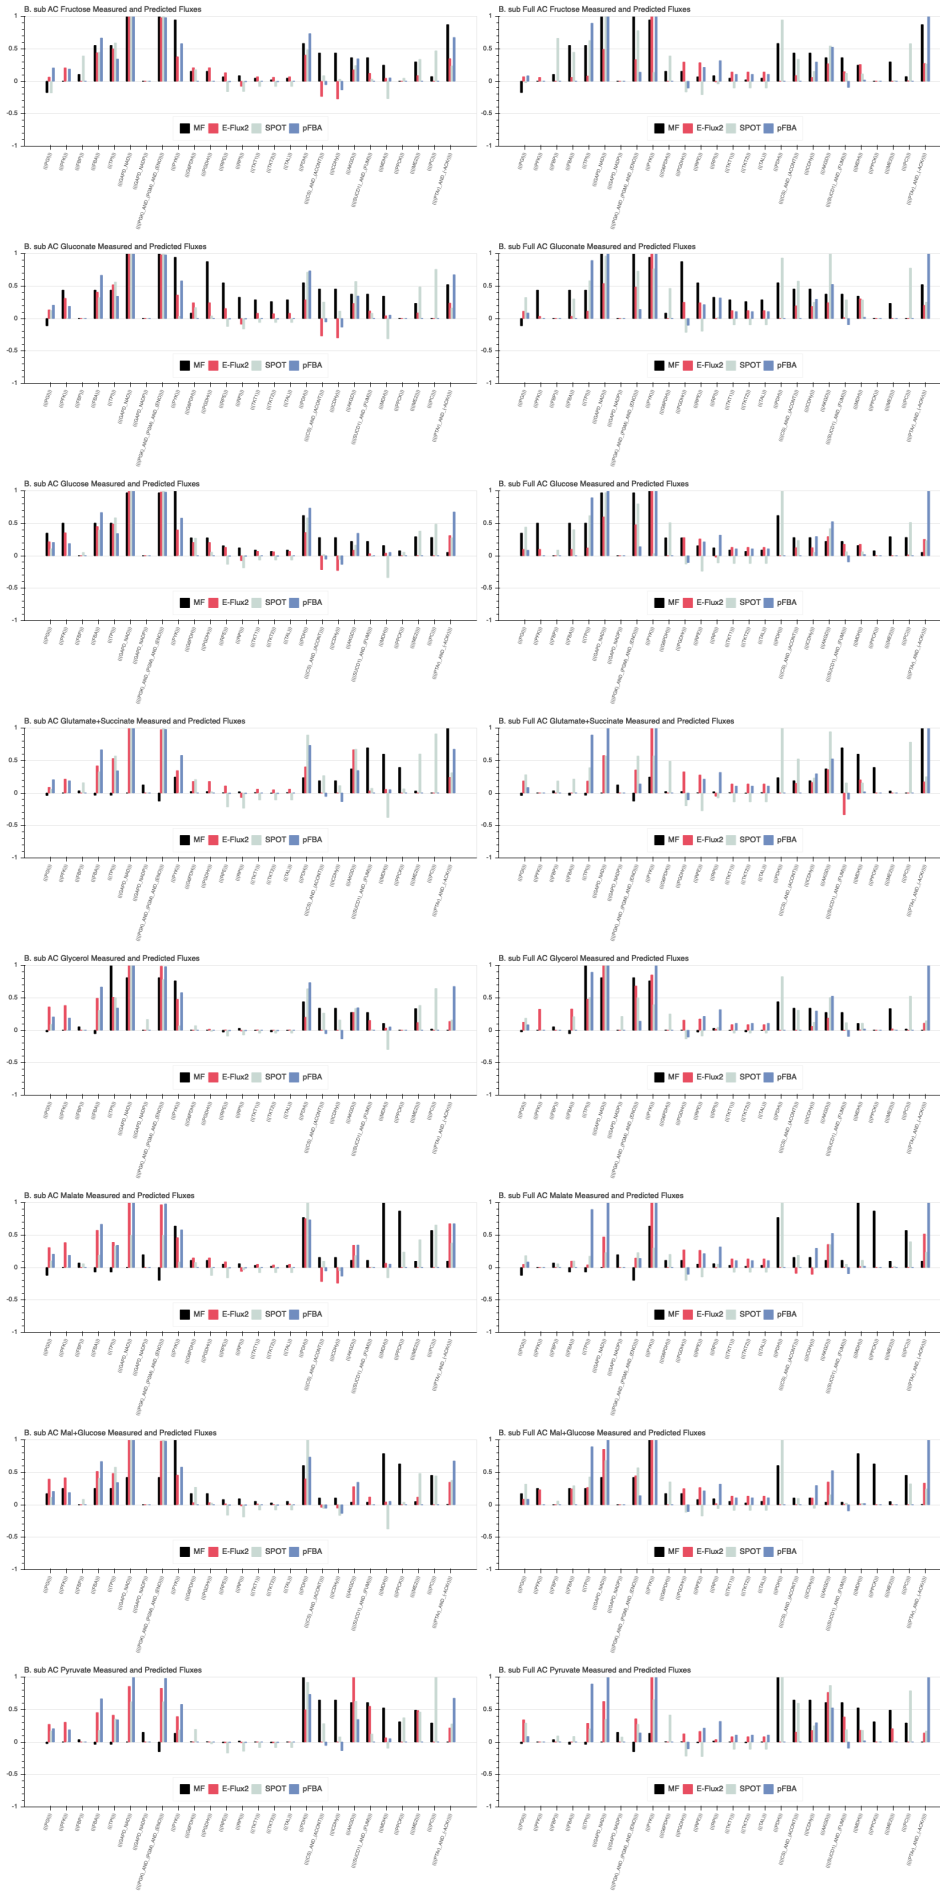



**S5 Fig. *B. subtilis* flux directionality AC vs Full AC all carbon sources:** Measured flux (black), E-Flux2 (red), SPOT (gray), pFBA (blue), and gene expression transcript abundance (green); all self-normalized to maximum values 1 and -1. Positive values reflect forward flux and negative values reflection reverse direction flux. The x-axis shows the measured central carbon flux reaction names.

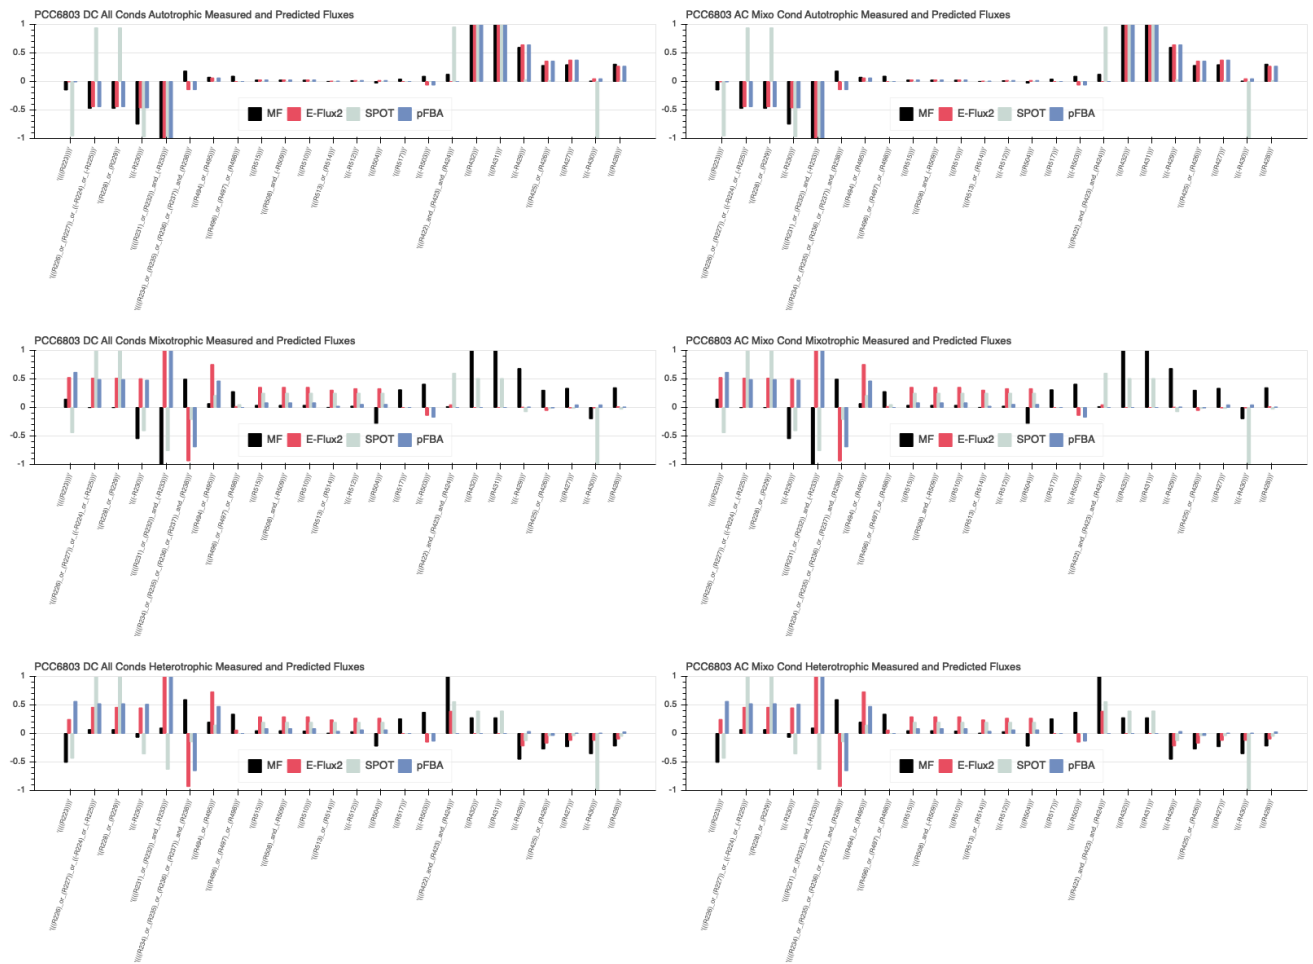

**S6 Fig PCC 6803 flux directionality DC and AC conditions:** Measured flux (black), E-Flux2 (red), SPOT (gray), pFBA (blue), and gene expression transcript abundance (green); all self-normalized to maximum values 1 and -1. Positive values reflect forward flux and negative values reflection reverse direction flux. The x-axis shows the measured central carbon flux reaction names.

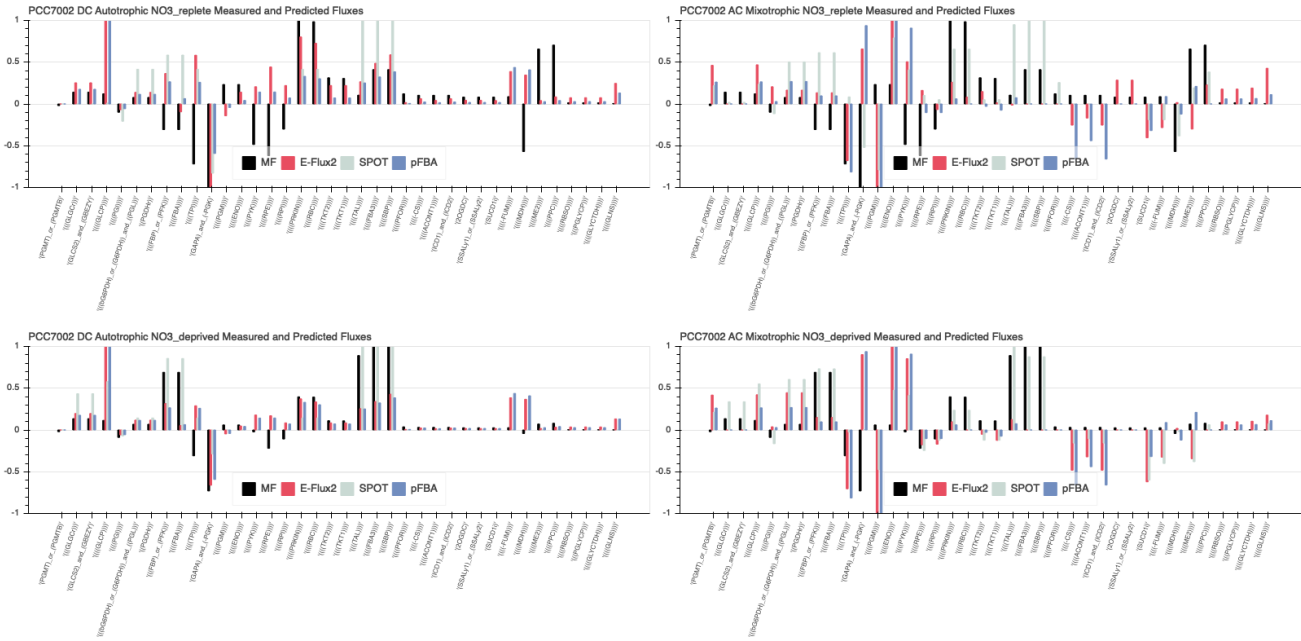

**S7 PCC 7002 flux directionality DC and AC conditions:** Measured flux (black), E-Flux2 (red), SPOT (gray), pFBA (blue), and gene expression transcript abundance (green); all self-normalized to maximum values 1 and -1. Positive values reflect forward flux and negative values reflection reverse direction flux. The x-axis shows the measured central carbon flux reaction names.

A) *E. coli* Spearman DC

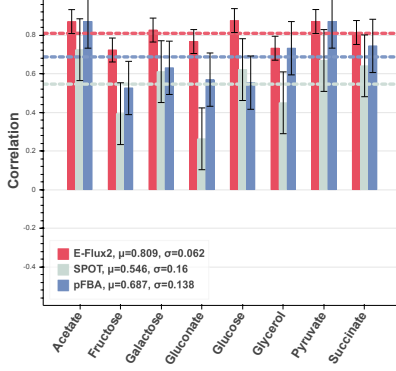

B) *E. coli* Spearman AC

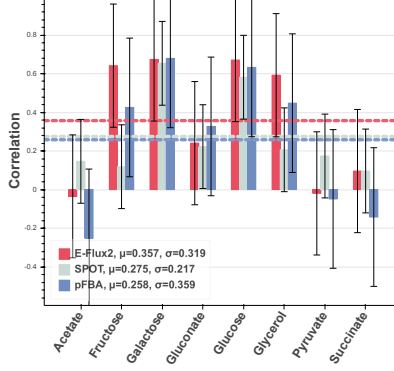

C) *E. coli* Spearman Full AC

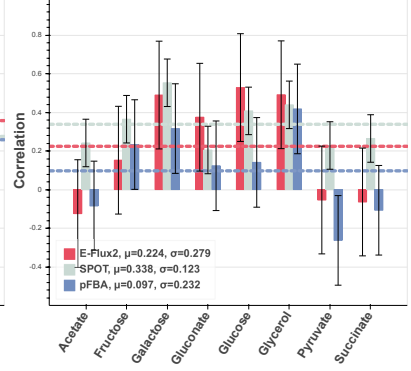

A) *B. subtilis* Spearman DC

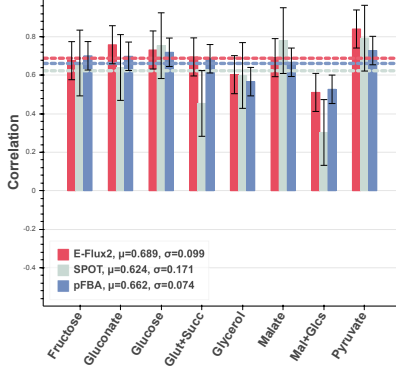

B) *B. subtilis* Spearman AC

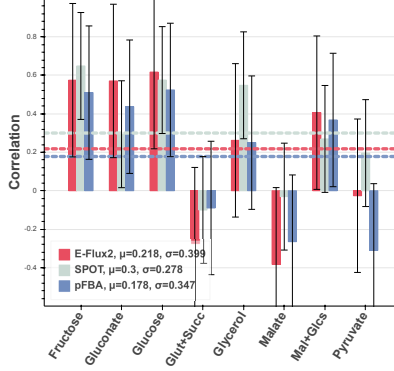

C) *B. subtilis* Full Spearman AC

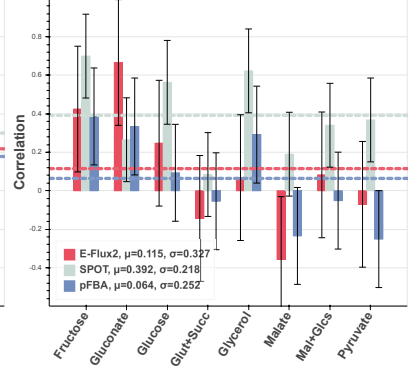

A) PCC 6803 Spearman DC All Conditions

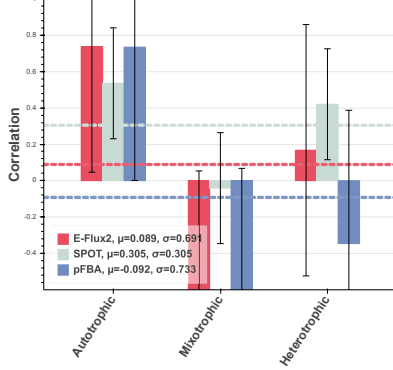

A) PCC 7002 Spearman DC Autotrophic

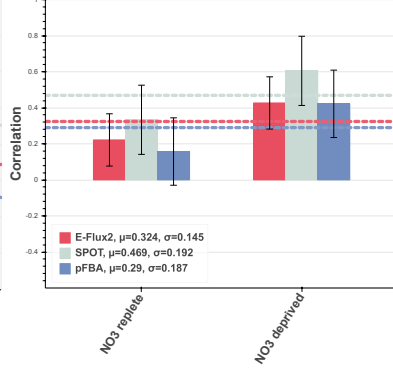

B) PCC 6803 Spearman AC Mixotrophic Condition

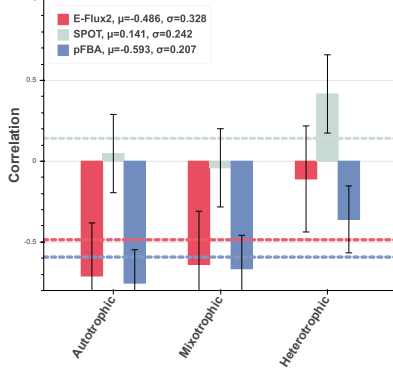

B) PCC 7002 Spearman AC Mixotrophic

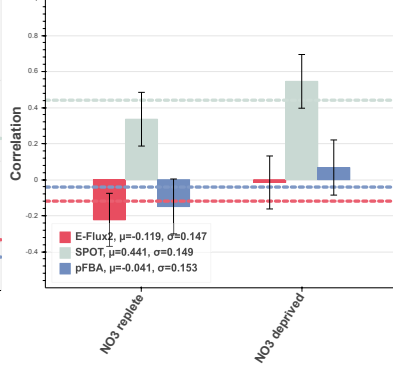

**S8 Spearman correlations equivalents of main figures 1-4:** Figures 1 through 4 from the main paper have been recreated using another correlation calculation, the Spearman rank correlation. The correlations are similar to the Pearson correlation from the main paper but a shift of lower correlation between measured vs predicted flux.

| <i>E. coli</i>                                                       |              |             |             |             |              |             |              |              |
|----------------------------------------------------------------------|--------------|-------------|-------------|-------------|--------------|-------------|--------------|--------------|
| Physiology                                                           | Acetate      | Fructose    | Galactose   | Glucose     | Glycerol     | Gluconate   | Pyruvate     | Succinate    |
| Growth rate (h <sup>-1</sup> )                                       | 0.29 ± 0.01  | 0.49 ± 0.01 | 0.18 ± 0.01 | 0.65 ± 0.01 | 0.49 ± 0.01  | 0.59 ± 0.01 | 0.39 ± 0.01  | 0.51 ± 0.01  |
| Uptake rate carbon source (mmol gCDW <sup>-1</sup> h <sup>-1</sup> ) | 13.58 ± 0.33 | 8.33 ± 0.29 | 1.97 ± 0.10 | 9.65 ± 0.04 | 10.14 ± 0.15 | 7.28 ± 0.03 | 26.71 ± 0.79 | 15.90 ± 0.31 |
| Acetate secretion (mmol gCDW <sup>-1</sup> h <sup>-1</sup> )         | -            | 3.33 ± 0.33 | -           | 6.83 ± 1.03 | 0.60 ± 0.20  | 5.00 ± 0.16 | 11.91 ± 0.53 | 3.32 ± 0.31  |
| Lactate secretion (mmol gCDW <sup>-1</sup> h <sup>-1</sup> )         | -            | -           | -           | -           | -            | -           | 1.16 ± 0.07  | -            |
| Fumarate secretion (mmol gCDW <sup>-1</sup> h <sup>-1</sup> )        | -            | -           | -           | -           | -            | -           | -            | 1.14 ± 0.07  |
| Biomass yield (g g <sup>-1</sup> )                                   | 0.35 ± 0.00  | 0.33 ± 0.01 | 0.46 ± 0.03 | 0.37 ± 0.00 | 0.47 ± 0.01  | 0.41 ± 0    | 0.16 ± 0.01  | 0.26 ± 0.01  |

| <i>B. subtilis</i> |                                         |                                         |                                         |                                         |                                         |                                         |                                         |                                         |
|--------------------|-----------------------------------------|-----------------------------------------|-----------------------------------------|-----------------------------------------|-----------------------------------------|-----------------------------------------|-----------------------------------------|-----------------------------------------|
| Specific Rate      | (mmol g <sup>-1</sup> h <sup>-1</sup> ) | (mmol g <sup>-1</sup> h <sup>-1</sup> ) | (mmol g <sup>-1</sup> h <sup>-1</sup> ) | (mmol g <sup>-1</sup> h <sup>-1</sup> ) | (mmol g <sup>-1</sup> h <sup>-1</sup> ) | (mmol g <sup>-1</sup> h <sup>-1</sup> ) | (mmol g <sup>-1</sup> h <sup>-1</sup> ) | (mmol g <sup>-1</sup> h <sup>-1</sup> ) |
| glucose            | 7.36                                    | -                                       | -                                       | -                                       | -                                       | -                                       | 5.95                                    | -                                       |
| Fructose           | -                                       | 5.72                                    | -                                       | -                                       | -                                       | -                                       | -                                       | -                                       |
| gluconate          | -                                       | -                                       | 5.13                                    | -                                       | -                                       | -                                       | -                                       | -                                       |
| Succinate          | -                                       | -                                       | -                                       | 3.35                                    | -                                       | -                                       | -                                       | -                                       |
| glutamate          | -                                       | -                                       | -                                       | 2.21                                    | -                                       | -                                       | -                                       | -                                       |
| Glycerol           | -                                       | -                                       | -                                       | -                                       | 6.22                                    | -                                       | -                                       | -                                       |
| malate             | -                                       | -                                       | -                                       | -                                       | -                                       | 26.51                                   | 14.6                                    | -                                       |
| pyruvate           | -                                       | -                                       | -                                       | -                                       | -                                       | -                                       | -                                       | 8.26                                    |

| PCC 6803         |                        |                        |                          |
|------------------|------------------------|------------------------|--------------------------|
| Specific Rate    | Autotroph mmol/g DCW/h | Mixotroph mmol/g DCW/h | Heterotroph mmol/g DCW/h |
| glucose          | 0                      | 0.24                   | 0.41                     |
| CO <sub>2</sub>  | 0                      | 1000                   | 1000                     |
| HCO <sub>3</sub> | 3.7                    | 0                      | 0                        |
| Photons          | 1000                   | 1000                   | 50                       |

| PCC 7002        |                                                                 |                                                                  |
|-----------------|-----------------------------------------------------------------|------------------------------------------------------------------|
| Specific Rate   | NO <sub>3</sub> replete (mmol g <sup>-1</sup> h <sup>-1</sup> ) | NO <sub>3</sub> depleted (mmol g <sup>-1</sup> h <sup>-1</sup> ) |
| CO <sub>2</sub> | -29.5                                                           | -9.67                                                            |
| NO <sub>3</sub> | -1000                                                           | 0                                                                |

**S1 Table. Measured uptake rates:** Measured uptake rates for the four organism models (*E. coli*, *B. subtilis*, PCC 6803, and PCC7002), sourced from literature (See Materials and Methods 2.1). For *E. coli*, mean values and standard deviations

were obtained from 3 biological replicates. Any uptake rate set to 1000 is based on information indicating unconstrained uptake of the respective metabolite. In PCC 6803, the light inhibited culture was PSII chemically inhibited and cultured under aluminum foil. In an attempt to realistically constrain this experimental environment and chemical inhibition on the light reaction, 50 photon units were applied rather than 0. Additionally, this culture was grown in open air and therefore the CO<sub>2</sub> intake is left unconstrained. All uptake rates are present in units of mmol/g DCW/h.

| Rxn# | Rxn Metabolites                                                                                               | E-Flux2 | SPOT    | pFBA    |
|------|---------------------------------------------------------------------------------------------------------------|---------|---------|---------|
| R419 | Glycerone phosphate + D-Erythrose 4-phosphate --> Sedoheptulose 1,7-bisphosphate                              | 0.0000  | 0.1922  | 0.0000  |
| R420 | Glycerone phosphate + D-Erythrose 4-phosphate --> Sedoheptulose 1,7-bisphosphate                              | 0.0000  | 0.0000  | 0.0000  |
| R421 | H2O + Sedoheptulose 1,7-bisphosphate --> Orthophosphate + Sedoheptulose 7-phosphate                           | 0.0000  | 0.1922  | 0.0000  |
| R422 | D-Glucose 6-phosphate + NADP+ --> D-Glucono-1,5-lactone 6-phosphate + NADPH + H+                              | 0.0000  | 0.0225  | 0.0000  |
| R423 | D-Glucono-1,5-lactone 6-phosphate + H2O --> 6-Phospho-D-gluconate                                             | 0.0000  | 0.0225  | 0.0000  |
| R424 | 6-Phospho-D-gluconate + NADP+ --> NADPH + H+ + CO2 + D-Ribulose 5-phosphate                                   | 0.0000  | 0.0225  | 0.0000  |
| R425 | D-Ribose 5-phosphate <=> D-Ribulose 5-phosphate                                                               | 0.0030  | 0.0002  | -0.0031 |
| R426 | D-Ribose 5-phosphate <=> D-Ribulose 5-phosphate                                                               | 0.0030  | 0.0002  | -0.0031 |
| R427 | D-Glyceraldehyde 3-phosphate + Sedoheptulose 7-phosphate <=> D-Xylulose 5-phosphate + D-Ribose 5-phosphate    | 0.0099  | 0.0004  | 0.0011  |
| R428 | D-Glyceraldehyde 3-phosphate + D-Fructose 6-phosphate <=> D-Xylulose 5-phosphate + D-Erythrose 4-phosphate    | -0.0004 | 0.0004  | 0.0050  |
| R429 | D-Ribulose 5-phosphate <=> D-Xylulose 5-phosphate                                                             | 0.0034  | -0.0007 | -0.0061 |
| R430 | D-Glyceraldehyde 3-phosphate + Sedoheptulose 7-phosphate <=> D-Fructose 6-phosphate + D-Erythrose 4-phosphate | -0.0099 | 0.1918  | -0.0011 |

**S2 Table. PCC 6803 Pentose Phosphate Pathway Fluxes:** Predicted fluxes for 12 pentose phosphate pathway reactions for PCC 6803 under the heterotrophic growth condition and using heterotrophic gene expression data. Fluxes vectors were normalized by the l2 norm of the genome scale flux vector. Fluxes marked yellow show net flux values that are essentially zero flux (fluxes less than 1e-6). Green shows the net positive flux values. Red shows net negative flux values predicted, suggesting predicting the reversal of the pentose phosphate pathway. In SPOT, higher flux is passing through the pentose phosphate reactions, while in the E-Flux2 and pFBA show significantly less flux.
